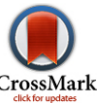

## Correction

# Correction: Suppression of Mitochondrial Electron Transport Chain Function in the Hypoxic Human Placenta: A Role for miRNA-210 and Protein Synthesis Inhibition

The *PLOS ONE* Staff

### Notice of Republication

This article was republished on February 7, 2014, to update the figure legends for Figures 2-4, which were incorrectly labeled in the original version of the article. Please download this article again to view the correct version. The originally published, uncorrected article and the republished, corrected article are provided here for reference.

### Supporting Information

#### File S1.

Originally published, uncorrected article.

#### File S2.

Republished corrected article.

### Reference

1. Colleoni F, Padmanabhan N, Yung H-w, Watson ED, Cetin I, et al. (2013) Suppression of Mitochondrial Electron Transport Chain Function in the Hypoxic Human Placenta: A Role for miRNA-210 and Protein Synthesis Inhibition. *PLoS ONE* 8(1): e55194. doi:10.1371/journal.pone.0055194

**Citation:** The *PLOS ONE* Staff (2014) Correction: Suppression of Mitochondrial Electron Transport Chain Function in the Hypoxic Human Placenta: A Role for miRNA-210 and Protein Synthesis Inhibition. *PLoS ONE* 9(4): e93245. doi:10.1371/journal.pone.0093245

**Published:** April 4, 2014

**Copyright:** © 2014 The *PLOS ONE* Staff. This is an open-access article distributed under the terms of the Creative Commons Attribution License, which permits unrestricted use, distribution, and reproduction in any medium, provided the original author and source are credited.
